# Supplementary material for: Oral Health-Related Quality of Life in Rheumatoid Arthritis: A Comparative Analysis
Source: Research Square preprint supplement (doi:10.21203/rs.3.rs-1324711/v1), 2022-02-14
Supplement: Supplementary file 1 [file b0e34d5d5e705f5e7660673a.docx]

| Supplementary Table 1. Temporomandibular joint disorder questionnaire | | | | |
| --- | --- | --- | --- | --- |
| Questions | Never | Sometimes | Often | Always |
| 1. Do you notice sounds or clicks in your temporomandibular joint when opening or closing your mouth? |  |  |  |  |
| 1. Do you have limitation and discomfort when you open your mouth? |  |  |  |  |
| 1. Do you feel pain in your temporomandibular joint? |  |  |  |  |
| 1. Do you feel pain around your ears? |  |  |  |  |
| 1. Do you feel pain in your cheeks? |  |  |  |  |
| 1. Do you feel pain around your temples? |  |  |  |  |
| 1. Do you have headaches? |  |  |  |  |
| 1. Do you experience jaw-locking? |  |  |  |  |
| 1. Do you feel discomfort and unease while chewing? |  |  |  |  |
| 1. Do you feel discomfort and unease while talking? |  |  |  |  |
| 1. Do you feel discomfort and unease while swallowing? |  |  |  |  |
| 1. Do you have pain while clenching? |  |  |  |  |
| 1. Do you experience bruxism? |  |  |  |  |
